# Supplementary material for: Peripheral Myelin Protein 22 Gene Mutations in Charcot-Marie-Tooth Disease Type 1E Patients
Source: MDPI journal article supplement (doi:10.3390/genes13071219), 2022-07-08
Supplement: s1 [file s1]

**Table S3.** Electrophysiological values of Charcot-Marie-Tooth disease type 1E patients with mutations in *PMP22* gene.

[illegible]

|              |    |   |   |   |      |     |      |   |   |   |   |   |   |   |   |   |   |   |   |
|--------------|----|---|---|---|------|-----|------|---|---|---|---|---|---|---|---|---|---|---|---|
| FC1060       | 33 | A | A | A | 12.1 | 3.2 | 10.0 | A | A | A | A | A | A | A | A | A | A | A | A |
| FC284 (II-1) | 15 | A | A | A | A    | A   | A    | A | A | A | A | A | A | A | A | A | A | A | A |

Normal DTL values: motor median nerve: <3.6 ms, ulnar nerve: <2.5 ms, peroneal nerve: <4.8 ms, and tibial nerve: <5.1 ms. Normal NCV values: motor median nerve: ≥50.5 m/s, ulnar nerve: ≥51.1 m/s, peroneal nerve: ≥41.2 m/s, tibial nerve: ≥41.1 m/s, sensory median nerve: ≥39.3 m/s, ulnar nerve: ≥37.5 m/s, and sural nerve: ≥32.1 m/s. Normal amplitude values: motor median nerve: ≥6 mV, ulnar nerve: ≥8 mV; peroneal nerve: ≥1.6 mV, tibial nerve: ≥6 mV, sensory median nerve: ≥8.8 μV, ulnar nerve, ≥7.9 μV; sural nerve, ≥6.0 μV.

Abbreviations: A: absent action potential, CMAP: compound muscle action potential, CMT1E, CMT type 1E, DTL: distal terminal latency, SNAP: sensory nerve action potential, SNCV: sensory nerve conduction velocity.
