# Supplementary material for: Peripheral Myelin Protein 22 Gene Mutations in Charcot-Marie-Tooth Disease Type 1E Patients
Source: MDPI journal article supplement (doi:10.3390/genes13071219), 2022-07-08
Supplement: s1 [file s1]

**Table S2.** Clinical features of Charcot-Marie-Tooth disease type 1E patients with mutations in *PMP22* gene.

| Patient ID     | Sex | Ages (yr) |       | CMT<br>NSv2 | CMT<br>NS-R | CMT<br>ES | CMT<br>ES-R | FDS | MRC <sup>1</sup> |     | Sensory<br>loss | DTR <sup>2</sup><br>Knee/ankle | Hearing<br>loss | Foot<br>deformity |
|----------------|-----|-----------|-------|-------------|-------------|-----------|-------------|-----|------------------|-----|-----------------|--------------------------------|-----------------|-------------------|
|                |     | Exam      | Onset |             |             |           |             |     | UEx              | LEx |                 |                                |                 |                   |
| FC618 (II-1)   | M   | 22        | 1     | 31          | 38          | 23        | 29          | 7   | +++              | +++ | Yes             | A/A                            | No              | Yes               |
| FC541          | M   | 13        | 12    | ND          | ND          | ND        | ND          | 1   | +                | ++  | Yes             | A/A                            | Yes             | Yes               |
| FC50 (II-2)    | F   | 84        | 31    | 24          | 28          | 20        | 24          | 4   | ++               | ++  | Yes             | A/A                            | Yes             | Yes               |
| FC50 (III-7)   | F   | 64        | 25    | 20          | 23          | 16        | 19          | 4   | ++               | +++ | Yes             | A/A                            | Yes             | Yes               |
| FC50 (III-8)   | M   | 49        | 19    | 23          | 28          | 18        | 22          | 3   | ++               | ++  | Yes             | A/A                            | Yes             | Yes               |
| FC50 (III-11)  | F   | 45        | 26    | 21          | 24          | 17        | 20          | 4   | ++               | +++ | Yes             | A/A                            | Yes             | Yes               |
| FC50 (IV-8)    | M   | 20        | 12    | 15          | 17          | 11        | 13          | 1   | +                | ++  | Yes             | A/A                            | Yes             | Yes               |
| FC50 (IV-11)   | M   | 15        | 11    | 15          | 17          | 11        | 13          | 2   | +                | ++  | Yes             | A/A                            | Yes             | Yes               |
| FC303          | M   | 20        | 10    | 13          | 16          | 9         | 12          | 1   | +                | +   | Yes             | D/A                            | No              | Yes               |
| FC680 (I-1)    | M   | 70        | 27    | 21          | 29          | 17        | 22          | 3   | ++               | ++  | Yes             | A/A                            | Yes             | Yes               |
| FC680 (II-1)   | M   | 34        | 9     | 20          | 23          | 16        | 19          | 2   | +                | +   | Yes             | A/A                            | Yes             | Yes               |
| FC970 (II-3)   | F   | 40        | 29    | 9           | 10          | 9         | 10          | 1   | +                | +   | Yes             | D/D                            | No              | Yes               |
| FC970 (II-4)   | F   | 39        | 34    | 14          | 16          | 11        | 13          | 1   | +                | +   | Yes             | D/D                            | Yes             | No                |
| FC970 (III-1)  | F   | 13        | 12    | 7           | 11          | 6         | 9           | 0   | -                | +   | No              | N/D                            | No              | No                |
| FC285 (II-1)   | M   | 16        | <1    | 31          | 38          | 23        | 29          | 7   | +++              | +++ | Yes             | A/A                            | No              | Yes               |
| FC376 (II-1)   | F   | 11        | 2     | 32          | 38          | 24        | 29          | 7   | +++              | +++ | Yes             | A/A                            | No              | Yes               |
| FC732 (II-2)   | F   | 7         | 2     | 29          | 35          | 21        | 26          | 7   | ++               | +++ | Yes             | A/A                            | No              | Yes               |
| FC829 (III-3)  | F   | 12        | <1    | 25          | 29          | 17        | 10          | 7   | ++               | +++ | Yes             | A/A                            | No              | Yes               |
| FC895          | M   | 7         | <1    | 31          | 35          | 23        | 26          | 6   | +++              | +++ | Yes             | A/A                            | No              | No                |
| FC416 (II-2)   | F   | 28        | <1    | 30          | 35          | 22        | 26          | 7   | ++               | +++ | Yes             | A/A                            | No              | Yes               |
| FC1102 (I-2)   | F   | 47        | 16    | ND          | ND          | ND        | ND          | 2   | +                | ++  | Yes             | D/A                            | No              | Yes               |
| FC1102 (II-1)  | M   | 21        | 14    | 15          | 17          | 11        | 13          | 2   | +                | ++  | Yes             | D/A                            | No              | Yes               |
| FC1325 (II-3)  | M   | 54        | 8     | 13          | 20          | 15        | 23          | 3   | +                | ++  | Yes             | A/A                            | Yes             | Yes               |
| FC1325 (III-1) | M   | 31        | 20    | 8           | 12          | 11        | 15          | 2   | +                | +   | Yes             | D/A                            | No              | Yes               |
| FC1061 (III-1) | F   | 26        | <1    | 31          | 37          | 23        | 28          | 7   | +++              | +++ | Yes             | A/A                            | No              | Yes               |
| FC1088         | F   | 48        | 5     | 30          | 37          | 22        | 28          | 7   | +++              | +++ | Yes             | A/A                            | No              | Yes               |
| FC1140 (II-2)  | F   | 6         | 1     | 22          | 29          | 16        | 20          | 4   | ++               | +++ | Yes             | A/A                            | No              | No                |
| FC35 (II-5)    | M   | 34        | 20    | ND          | ND          | ND        | ND          | 3   | +                | ++  | Yes             | A/A                            | Yes             | Yes               |
| FC35 (II-6)    | M   | 32        | 19    | 15          | 22          | 12        | 17          | 3   | +                | ++  | Yes             | A/A                            | Yes             | Yes               |

|              |   |    |    |    |    |    |    |   |     |     |     |     |    |     |
|--------------|---|----|----|----|----|----|----|---|-----|-----|-----|-----|----|-----|
| FC608        | M | 39 | 31 | 19 | 25 | 12 | 17 | 2 | +   | ++  | Yes | A/A | No | Yes |
| FC1060       | M | 33 | 21 | 15 | 23 | 9  | 12 | 3 | +   | ++  | Yes | D/A | No | No  |
| FC284 (II-1) | F | 15 | <1 | 34 | 37 | 26 | 28 | 7 | +++ | +++ | Yes | A/A | No | Yes |

<sup>1</sup>Muscle weakness in upper limbs (UEx): -: normal, +: intrinsic hand weakness of 4/5 on the Medical Research Council (MRC) scale, ++: intrinsic hand weakness < 4/5 on the MRC scale, +++: proximal weakness. Muscle weakness in lower limbs (LEx): +: ankle dorsiflexion of 4/5 on the MRC scale, ++: ankle dorsiflexion < 4/5, +++: proximal weakness.

<sup>2</sup>Deep tendon reflex (DTR): D: diminished, A: absent, N: normal reflex.

Abbreviations: A: absent action potential, CMAP: compound muscle action potential, CMTNSv2: CMT neuropathy score ver. 2, CMTNS-R: Rasch-modified CMTNS, CMTES: CMT examination score, CMTES-R: Rasch-modified CMTES, ND: not determined, MNCV: median nerve conduction velocity, ND: not determined, SNAP: sensory nerve action potential, SNCV: sensory nerve conduction velocity.
