# Supplementary material for: Peripheral Myelin Protein 22 Gene Mutations in Charcot-Marie-Tooth Disease Type 1E Patients
Source: MDPI journal article supplement (doi:10.3390/genes13071219), 2022-07-08
Supplement: s1 [file s1]

**Table S1.** In silico prediction of *PMP22* mutations.

| Mutations <sup>1</sup> |             | dbSNP<br>accession No | GERP       | In silico analyses <sup>2</sup> |       |        |
|------------------------|-------------|-----------------------|------------|---------------------------------|-------|--------|
| Nucleotide             | Amino acid  |                       |            | PRO                             | PP2   | MU     |
| c.35A>G                | p.H12R      | rs1909248652          | 3.37       | -7.52*                          | 0.00  | 0.66   |
| c.47T>G                | p.L16R      | NR                    | 3.36       | -3.46*                          | 0.76* | -0.38* |
| c.68C>G                | p.T23R      | rs906563423           | 3.58       | -5.61*                          | 1.00* | 0.84   |
| c.179-1G>A             | p.?         | rs1597608220          | 5.61       | -                               | -     | -      |
| c.215C>T               | p.S72L      | rs104894621           | 5.61       | -4.85*                          | 1.00* | 0.13   |
| c.245T>C               | p.L82P      | rs878853113           | 4.52       | -3.98*                          | 1.00* | -1.00* |
| c.256C>T               | p.Q86X      | rs11545341            | 5.61       | -                               | -     | -      |
| c.281delG              | p.G94Afs*16 | NR                    | 5.76       | -                               | -     | -      |
| c.280_281delinsT       | p.G94Sfs*16 | rs864622678           | -0.53/5.76 | -                               | -     | -      |
| c.298G>A               | p.G100R     | rs1597607651          | 5.76       | -5.14*                          | 1.00* | 0.15   |
| c.318delT              | p.G107Vfs*3 | NR                    | -0.563     | -                               | -     | -      |
| c.319+1G>T             | p.?         | NR                    | 5.76       | -                               | -     | -      |
| c.323T>C               | p.L108P     | NR                    | 5.16       | -5.93*                          | 1.00* | -1.00* |
| c.325T>C               | p.C109R     | rs1597597876          | 5.16       | -7.33*                          | 1.00* | 0.44   |

<sup>1</sup> Reference nucleotide and amino acid sequences: NM\_000304.4 and NP\_000295.1.

<sup>2</sup> In silico scores of PROVEAN (PRO) < -2.5, PolyPhen-2 (PP2) ~1, and MUpro (MU) < 0 indicate pathogenic prediction (\* denotes a pathogenic prediction).

Abbreviations: CMT1E: Charcot-Marie-Tooth disease type 1E, GERP: genomic evolutionary rate profiling.
